# Supplementary material for: A transcriptional network required for bradyzoite development in Toxoplasma gondii is dispensable for recrudescent disease
Source: PubMed Central journal article supplement (PMC10539341; doi:10.1038/s41467-023-40948-w), 2023-09-28
Supplement: 41467_2023_40948_MOESM3_ESM.pdf [file 41467_2023_40948_MOESM3_ESM.pdf]

### Description of Additional Supplementary Files

File Name: Supplementary Data 1

Description: Primers used in the present study.

File Name: Supplementary Data 2

Description: Bulk RNAseq data from in vitro analysis of the effect of bradyzoite induction conditions on transcript abundance in wild type,  $\Delta$ ROCY1 and  $\Delta$ BFD1 parasites in the *T. gondii* VEG genetic background.

File Name: Supplementary Data 3

Description: Summary data from enhanced crosslinking immunoprecipitation of FLAG-tagged ROCY1 and its putative target RNA substrates.

File Name: Supplementary Data 4

Description: RNAseq data of host and parasite transcript abundance from mice infected for ~30 days with wild type,  $\Delta$ ROCY1 or  $\Delta$ BFD1 (for host gene expression) or wild type and  $\Delta$ ROCY1 (for parasite gene expression). RNA was taken from the brains of infected mice and immediately subjected to RNAseq analysis or after enriching for parasites by syringe lysis and washing.
